# Supplementary material for: Early Diagnosis and Management of Nitrogen Deficiency in Plants Utilizing Raman Spectroscopy
Source: PubMed Central journal article supplement (PMC7291773; doi:10.3389/fpls.2020.00663), 2020-06-05
Supplement: Table_1.pdf [file Table_1.pdf]

**Supplementary Table1.** Primer sets for qRT-PCR and genotyping analysis

| Gene name                   | Primer sequence                                                        |
|-----------------------------|------------------------------------------------------------------------|
| <b>qRT-PCR</b>              |                                                                        |
| <b>ORE1 (Arabidopsis)</b>   | F 5'-CTTACCATGGAAGGCTAAGATGGG -3'<br>R 5'-TCGGGTATTTCCGGTCTCTCAC -3'   |
| <b>ORE1 (Pak Choi)</b>      | F 5'-CGATGCATCAAGAATCGGTGA -3'<br>R 5'- CGGTGGCAGAGAAGAAAGTG-3'        |
| <b>ORE1 (Choy Sum)</b>      | F 5'- GGAAGTCACTTGTGGGTATG -3'<br>R 5'- CTTTGTACCATCGGCACGTT -3'       |
| <b>NRT2.1(Arabidopsis)</b>  | F 5'- TGAGCAGGAGAAGCAGAAGA-3'<br>R 5'- TTGTTGGGTGTGTTCTCAGG-3'         |
| <b>NRT2.2 (Arabidopsis)</b> | F 5'-GCTATGCTTTCTCGGTAGATGGTAG-3'<br>R 5'-AATGTCATGTTTGGTGAGGTTAAGA-3' |
| <b>ACT2 (Arabidopsis)</b>   | F 5'-AGTGGTCGTACAACCGGTATTGT-3'<br>R 5'-GATGGCATGAGGAAGAGAGAAAC -3'    |
| <b>ACT2 (Pak Choi)</b>      | F 5'- TGCTGGATTCTGGTGATGGT-3'<br>R 5'- GGCGTGTGGAAGAGAGAAAC-3'         |
| <b>ACT2 (Choy Sum)</b>      | F 5'- TGCTGGATTCTGGTGATGGT-3'<br>R 5'- GGCGTGTGGAAGAGAGAAAC-3'         |
| <b>Genotyping</b>           |                                                                        |
| <b>LBb1.3</b>               | 5'-ATTTTGCCGATTTCCGGAAC -3'                                            |
| <b>LP (<i>nrt2.1-2</i>)</b> | 5'-GTTCTCCATGAGCTTCGTGAG -3'                                           |
| <b>RP (<i>nrt2.1-2</i>)</b> | 5'-CTTACCATGGAAGGCTAAGATGGG -3'                                        |
