# Supplementary material for: Early Diagnosis and Management of Nitrogen Deficiency in Plants Utilizing Raman Spectroscopy
Source: PubMed Central journal article supplement (PMC7291773; doi:10.3389/fpls.2020.00663), 2020-06-05
Supplement: Table_2.pdf [file Table_2.pdf]

**Supplementary Table 2.** P-value data for Figure 1b/c/d and Figure 4b/c/d.

| <b>Plant</b>       | <b>Chlorophyll content</b> | <b>Nitrate content</b> | <b><i>ORE1</i><br/>transcript</b> |
|--------------------|----------------------------|------------------------|-----------------------------------|
| <b>Arabidopsis</b> | 0.584535                   | 2.61E-06               | 0.008142                          |
| <b>Pak Choi</b>    | 0.154849                   | 4.37E-05               | 7.00406E-05                       |
| <b>Choy Sum</b>    | 0.385415                   | 1.65E-06               | 0.000197                          |
