# Supplementary material for: Early Diagnosis and Management of Nitrogen Deficiency in Plants Utilizing Raman Spectroscopy
Source: PubMed Central journal article supplement (PMC7291773; doi:10.3389/fpls.2020.00663), 2020-06-05
Supplement: Table_3.pdf [file Table_3.pdf]

**Supplementary Table3.** P-value data for Figure 2d.

| <b>Plant</b>       | <b>Nitrogen<br/>Deficiency</b> | <b>Phosphate<br/>deficiency</b> | <b>Potassium<br/>deficiency</b> |
|--------------------|--------------------------------|---------------------------------|---------------------------------|
| <b>Arabidopsis</b> | 0.005442373                    | 0.406504012                     | 0.875131679                     |
