# Supplementary material for: Early Diagnosis and Management of Nitrogen Deficiency in Plants Utilizing Raman Spectroscopy
Source: PubMed Central journal article supplement (PMC7291773; doi:10.3389/fpls.2020.00663), 2020-06-05
Supplement: Table_4.pdf [file Table_4.pdf]

**Supplementary Table 4.** P-value data for Figure 3b, c and d.

| <b>Arabidopsis<br/>(Col-0 and <i>nrt2.1-2</i>)</b> | <b>Chlorophyll<br/>content</b> | <b>Nitrate content</b> | <b><i>ORE1</i> transcript</b> |
|----------------------------------------------------|--------------------------------|------------------------|-------------------------------|
| <b>+N medium</b>                                   | 0.873644                       | 1.95271E-06            | 0.001194                      |
| <b>-N medium</b>                                   | 0.444163                       | 0.000848               | 0.038968                      |
