# Supplementary material for: Early Diagnosis and Management of Nitrogen Deficiency in Plants Utilizing Raman Spectroscopy
Source: PubMed Central journal article supplement (PMC7291773; doi:10.3389/fpls.2020.00663), 2020-06-05
Supplement: Table_5.pdf [file Table_5.pdf]

**Supplementary Table 5.** P-value data for intensity in Figure 3f and 4f.

| <b>Plants</b>                                       | <b>Nitrate peak*</b> |
|-----------------------------------------------------|----------------------|
| <b>Arabidopsis (Col-0 and <i>nrt2.1-2</i>) (+N)</b> | 8.30134E-06          |
| <b>Arabidopsis (Col-0 and <i>nrt2.1-2</i>) (-N)</b> | 0.008678788          |
| <b>Pak Choi (-N)</b>                                | 3.43089E-05          |
| <b>Choy Sum (-N)</b>                                | 0.001104344          |

\*Nitrate peak indicated Raman spectrum at 1046  $\text{cm}^{-1}$  and normalized with carotenoids peak (1520  $\text{cm}^{-1}$ ). Table above lists P values of nutrient-deprived growth medium (-N, -P and -K, respectively) relative to Full medium as obtained from Student's t-test analysis (n=14-16)
