# Supplementary material for: Early Diagnosis and Management of Nitrogen Deficiency in Plants Utilizing Raman Spectroscopy
Source: PubMed Central journal article supplement (PMC7291773; doi:10.3389/fpls.2020.00663), 2020-06-05
Supplement: Table_6.pdf [file Table_6.pdf]

**Supplementary Table 6.** P-value data for Figure 5c and d.

| <b>Arabidopsis</b> | <b>Nitrate content</b> | <b><i>ORE1</i> transcript</b> |
|--------------------|------------------------|-------------------------------|
| +N and -N (0 d)    | 1.4E-08                | 0.007870944                   |
| +N and R (1 d)     | 1.15E-11               | 0.028305343                   |
| +N and R (2 d)     | 7.71E-09               | 0.896780143                   |
| +N and R (4 d)     | 0.002985               | 0.118211177                   |
