# Supplementary material for: Early Diagnosis and Management of Nitrogen Deficiency in Plants Utilizing Raman Spectroscopy
Source: PubMed Central journal article supplement (PMC7291773; doi:10.3389/fpls.2020.00663), 2020-06-05
Supplement: Table_7.pdf [file Table_7.pdf]

**Supplementary Table 7.** P-value data for Figure 7.

| <b>Vegetables</b> |               | <b>Nitrate content</b> | <b><i>ORE1</i> transcript</b> |
|-------------------|---------------|------------------------|-------------------------------|
| <b>Pak Choi</b>   | +N(0)and R(0) | 0.000761               | 0.0107838                     |
|                   | +N(1)and R(1) | 0.037481               | 0.0641005                     |
|                   | +N(3)and R(3) | 0.508053               | 0.7168413                     |
| <b>Choy Sum</b>   | +N(0)and R(0) | 0.000271               | 0.0085814                     |
|                   | +N(1)and R(1) | 0.001392               | 0.0046007                     |
|                   | +N(3)and R(3) | 0.071868               | 0.9882439                     |
